# Supplementary material for: Pinecone biomass-derived hard carbon anodes for high-performance sodium-ion batteries
Source: Royal Society of Chemistry journal article supplement (doi:10.1039/c7ra07231g), 2017-01-01
Supplement: c7ra07231g1.pdf [file c7ra07231g1.pdf]

### Supporting Information

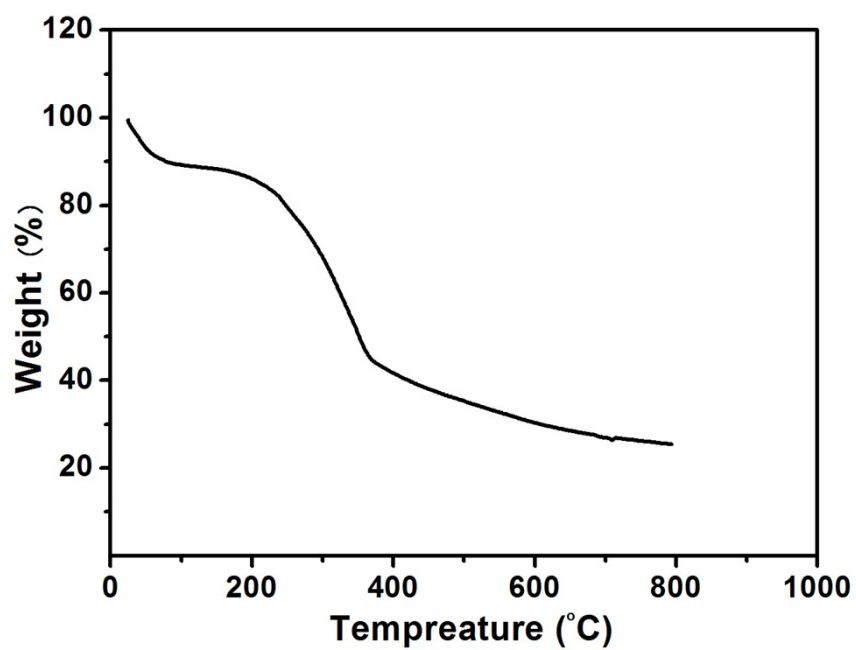

Fig. S1. TGA curve of the pinecone precursor carbonized at 800°C at N<sub>2</sub> atmosphere.

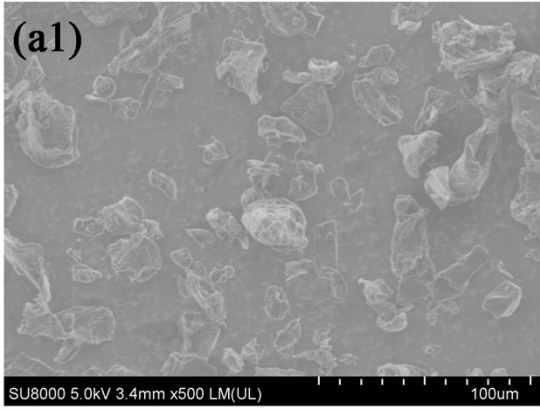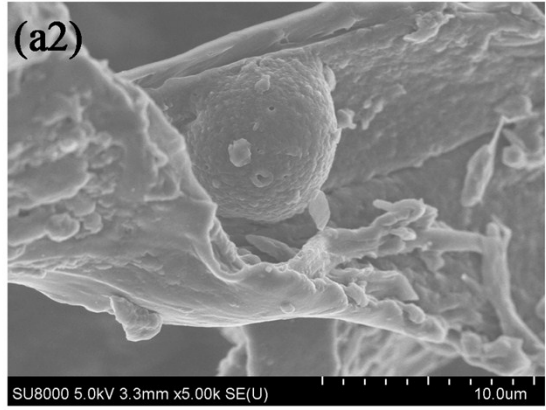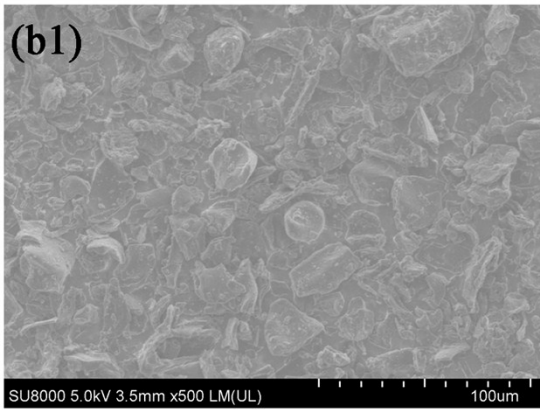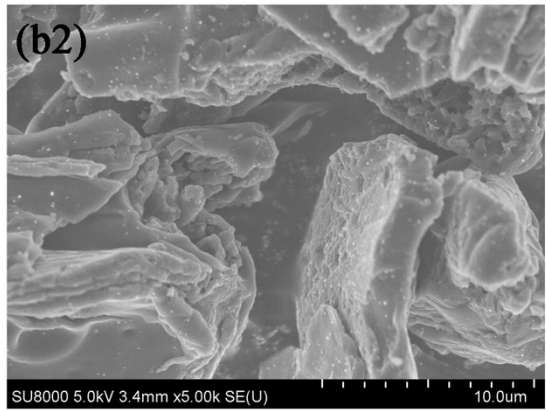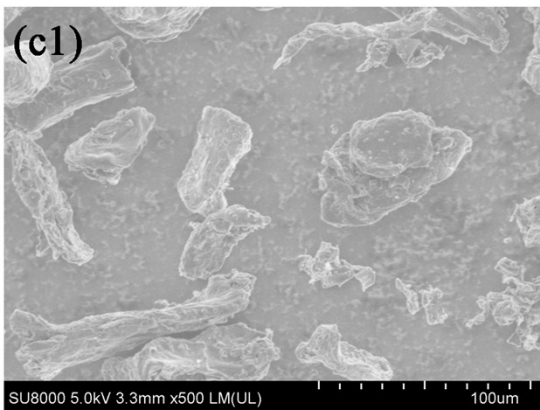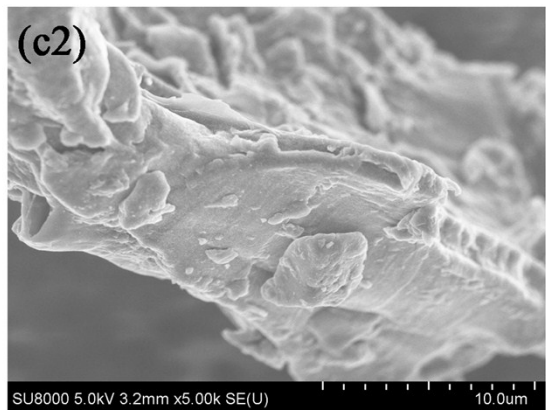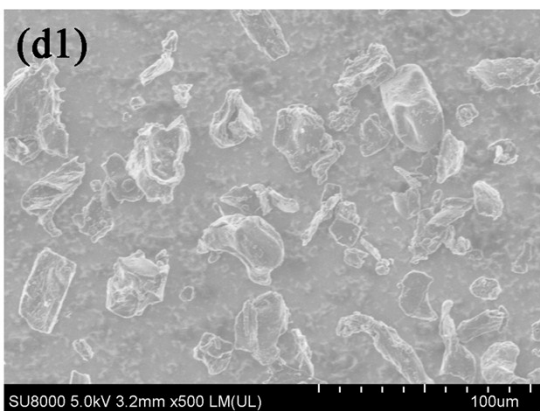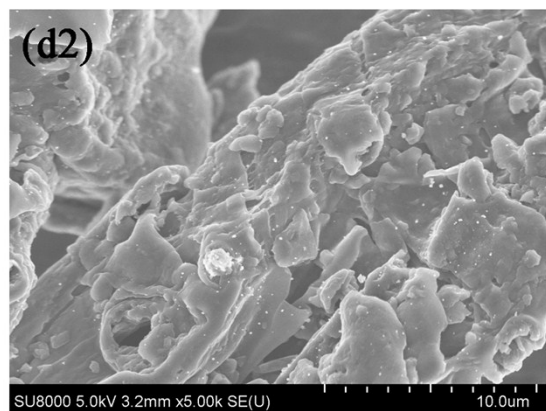

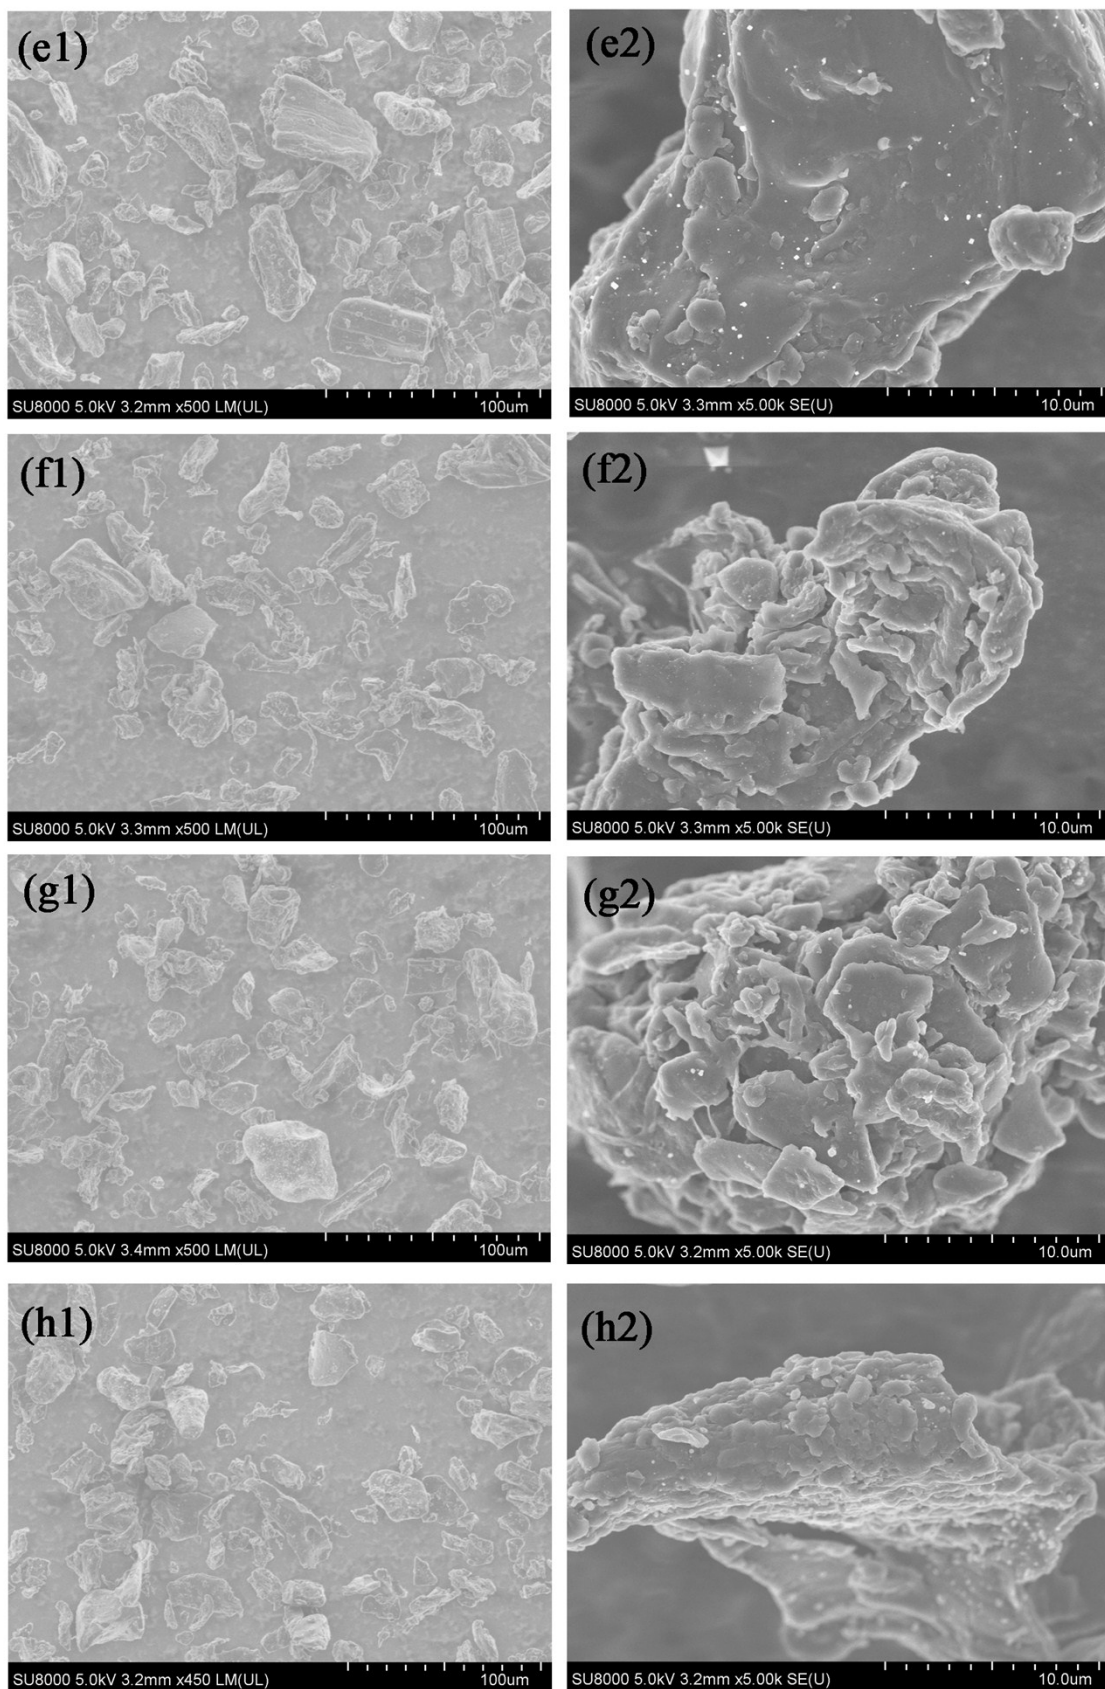

Fig. S2. (a1-h2) SEM images of PHC500, PHC800, PHC850, PHC900, PHC1000, PHC1200, PHC1400, and PHC1600, respectively.

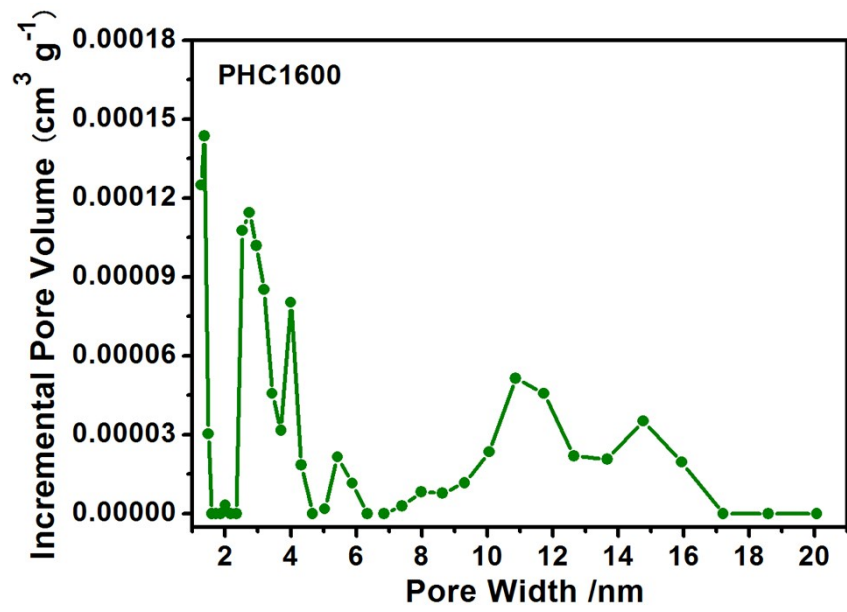

Fig. S3. Pore size distribution of PHC1600 at full scale calculated by the BJH method.
